# Supplementary material
Source: PubMed Central journal article supplement (PMC4596659)
Supplement: 10.1534_115.181065_genetics.115.181065-2.pdf [file 10.1534_115.181065_genetics.115.181065-2.pdf]

**Table S1 sgRNAs used in this study.** Distances from TSS are based on BDGP Release 6 (August 2014).

| Gene targeted         | sgRNA sequence (including PAM) | Distance from TSS (from 3' end of PAM) | Strand | Efficiency Score |
|-----------------------|--------------------------------|----------------------------------------|--------|------------------|
| wg                    | CCCCGATCCGATCGCATCGTCGG        | -78                                    | minus  | 4.85             |
|                       | GCAGCTGCAATGCAGGAGTCAGG        | -145                                   | plus   | 4.07             |
| wg                    | ATGAGGTTGCGCAAATAATCGGG        | -363                                   | plus   | 6.79             |
|                       | GGAAATGGAAAACTCTGCCCGG         | -337                                   | minus  | 4.26             |
| wg                    | TATATATTGTATCGTAAATTTGG        | 125                                    | minus  | 5.33             |
|                       | ATTTGTGCGATTAATTCCGCTGG        | 206                                    | minus  | 5.79             |
| wg                    | GCTGCTGACAAACGCAGAGTCGG        | 22                                     | plus   | 5.39             |
|                       | CGTGTGTTTCAGTTAAGCGTTGG        | 15                                     | plus   | 7.97             |
| hnt                   | GCGCAAATAGGATTACACATTGG        | -251                                   | minus  | 4.63             |
|                       | GGCCGTACTIONCATCTTTATTGG       | -304                                   | minus  | 3.41             |
| hnt                   | GAGAGAAGAGAGAAGCAGTCTGG        | -131                                   | minus  | 4.55             |
|                       | ATTTGAAACGAAGAATGAGAAGG        | -180                                   | plus   | 5.30             |
| hnt                   | AGTTGTATTTATAAATACAACGG        | 34                                     | minus  | 4.86             |
|                       | TGCGTTTGATATTTCTTTGTAGG        | 173                                    | minus  | 6.56             |
| hnt                   | GCCTAAAACAGTGCGAAATCCGG        | 444                                    | plus   | 4.81             |
|                       | AACAGTGCGAAATCCGGAGTTGG        | 450                                    | plus   | 5.66             |
| QUAS (#1)             | CTCGGGTAATCGCTTATCCTCGG        | -103                                   | plus   | 5.45             |
| QUAS (#2)             | CGGATAAACAATTATCCTCACGG        | -141                                   | plus   | 4.69             |
| QUAS (#3)             | CCAACGCGTTGGGAGCTCTCCGG        | -197                                   | plus   | 5.35             |
| engrailed (isoform A) | GCGTAACTCTCCCCGACGTCGG         | -20                                    | plus   | 5.72             |

|                       |                          |      |       |      |
|-----------------------|--------------------------|------|-------|------|
| engrailed (isoform A) | AACTGTCACGGTGAAAGAGAGG   | -78  | minus | 5.09 |
| engrailed (isoform A) | GGCGAGATCCCACAAGTAGCTGG  | -121 | minus | 5.80 |
| engrailed (isoform A) | AGCGAAAATCGATCAGTGTAAAGG | -210 | plus  | 5.65 |
| engrailed (isoform A) | GCTCACTCACTCCTATTAGCTGG  | -300 | minus | 7.33 |
| twist (isoform B)     | CAAAATGTCAATTTGAGCAATGG  | -14  | plus  | 6.52 |
| twist (isoform B)     | GCGGGACGACGATAGAGCGGCGG  | -61  | plus  | 6.48 |
| twist (isoform B)     | GCCATCCCGCTCCCACTCAATGG  | -122 | minus | 6.56 |
| twist (isoform B)     | GCATCGGCAGGTATGACGTCAGG  | -156 | minus | 6.75 |
| twist (isoform B)     | ATTTTCTCGAGCGGCAGCGGCGG  | -191 | minus | 6.37 |
| per                   | GAGTGAGTGTGAGAAAATTCTGG  | -50  | minus | 5.85 |
| per                   | CCGCCGTCGCTGAGAATCGCTGG  | -104 | plus  | 6.38 |
| per                   | TCGCTCGGGAAAATCGCTGGTCGG | -136 | plus  | 6.03 |
| per                   | TTCGCCAAGGGTTAATGTTTGG   | -151 | minus | 6.05 |
| y                     | CATTGGCCTGTCTTCGTCTTCGG  | -46  | minus | 6.83 |
| y                     | ACGAAGGCGCGGCCAACTTCGG   | -101 | plus  | 7.86 |
| y                     | ATTCGGGTGGTTCAGTGTTCGGG  | -135 | plus  | 6.55 |
| y                     | CGCAAAGTTGGCCGATCTATGGG  | -157 | minus | 4.45 |
| Os                    | TACCGCTCGTCGGCACTCGGCGG  | -39  | minus | 4.91 |
| Os                    | ATTCAGATCCGAAGAACCGCAGG  | -131 | plus  | 6.27 |
| en                    | GCGTTAACTCTCCCCGACGTCGG  | -19  | minus | 5.72 |
| en                    | AACTGTCACGGTGAAAGAGAGG   | -77  | plus  | 5.09 |
| en                    | GGCGAGATCCCACAAGTAGCTGG  | -120 | plus  | 5.80 |
| en                    | AGTGAGTGAGTGACAGCAGTTGG  | -164 | plus  | 4.10 |
| en                    | AGCGAAAATCGATCAGTGTAAAGG | -209 | minus | 5.65 |
| en                    | GCTCACTCACTCCTATTAGCTGG  | -299 | plus  | 7.33 |

|      |                          |      |       |      |
|------|--------------------------|------|-------|------|
| AttC | TATAGCAATCTATCTCTGAGTGG  | -48  | plus  | 6.52 |
| AttC | TATAAATTGGTATTTCATTGTCGG | -63  | minus | 6.64 |
| AttC | AGCTGAGCAATGTTTCGCACTGG  | -138 | plus  | 5.61 |
| AttC | GTGAACCACCTGGTCATTGCGGG  | -140 | minus | 9.39 |
| AttC | ATCCCCTTGAACTACTTGCCGG   | -209 | plus  | 6.92 |
| AttC | TAAAATTTGAACTACTCATTGG   | -338 | minus | 6.22 |
| Dro  | CGAATCTCTTGTTCATCGATGG   | -39  | minus | 4.31 |
| Dro  | AACATGAAAAGTCCCAAGATGG   | -101 | minus | 3.56 |
| Dro  | GCCGGTGATTCCCATCTTGGGG   | -112 | plus  | 4.30 |
| Dro  | ATCAACGAATAGGCGACTGAAGG  | -151 | plus  | 5.78 |
| Dro  | GCTGCGTAGTTTACATCATTGG   | -220 | plus  | 5.30 |
| sna  | CCGACGCCGCTGTCGCCATTTGG  | -68  | plus  | 7.39 |
| sna  | TCCATTTCCACCTCTCTCTCGG   | -235 | plus  | 8.15 |
| sna  | AAAGTGCTGTTGTTGTTGCTAGG  | -117 | minus | 7.14 |
| sna  | GAAATACGCAATAAGGGTATGGG  | -141 | minus | 5.39 |
| sna  | GAGAGAGAGAGTGAGAGAGCAGG  | -179 | minus | 5.96 |
