# Supplementary material
Source: PubMed Central journal article supplement (PMC4596659)
Supplement: 10.1534_115.181065_genetics.115.181065-3.pdf [file 10.1534_115.181065_genetics.115.181065-3.pdf]

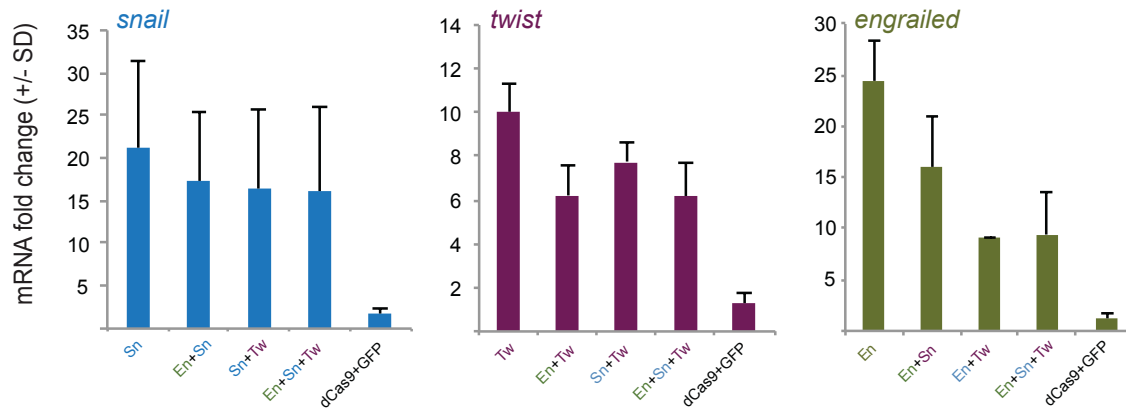

**Figure S3. Simultaneous activation of multiple target genes using multiplexed guides.** Three endogenous genes (*sna*, *twi*, and *en*) were robustly activated when activated using pairs of sgRNAs or a pool of three sgRNAs.
