# Supplementary material
Source: PubMed Central journal article supplement (PMC4596659)
Supplement: 10.1534_115.181065_genetics.115.181065-4.pdf [file 10.1534_115.181065_genetics.115.181065-4.pdf]

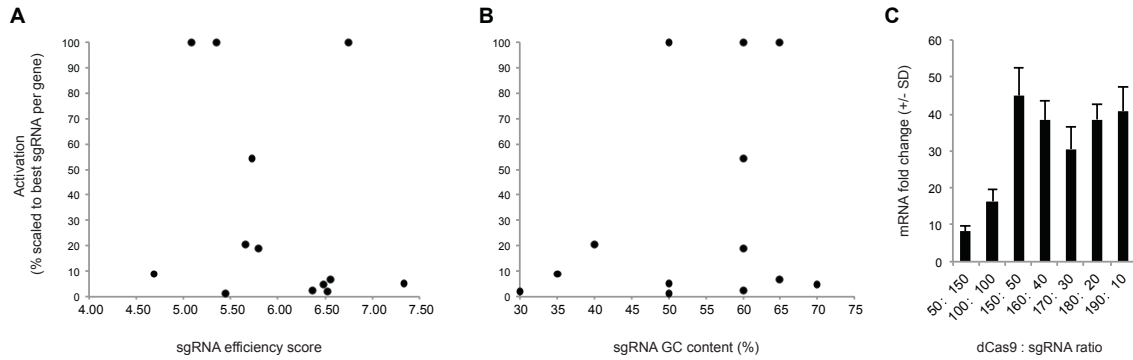

**Figure S2. sgRNA effectiveness is not related to nuclease efficiency or GC content, and sgRNAs are not rate limiting in these experiments.** (A) 13 sgRNAs targeting 3 genes (*QUAS:luciferase*, *twist*, and *engrailed*) are shown plotted against the predicted nuclease efficiency score. The activation for each sgRNA is shown as a percentage of the best-performing sgRNA for that gene. There is no correlation between sgRNA activation and efficiency score. (B) The same sgRNAs as in (A) are shown plotted against sgRNA GC content, revealing no correlation. (C) dCas9-VPR activation is robust over a wide range of dCas9 : sgRNA ratios, indicating that sgRNA availability is not limiting in our experiments.
