# Supplementary material
Source: PubMed Central journal article supplement (PMC4596659)
Supplement: 10.1534_115.181065_genetics.115.181065-5.pdf [file 10.1534_115.181065_genetics.115.181065-5.pdf]

**Table S3 Differentially expressed genes following activation of *snail*, *twist*, and *snail + twist* (p-value cutoff = 0.05).**

| dCas9-activated TF | Differentially Expressed Gene | Flybase ID  | CG number | Fold Change (Log2) | ChiP Peak |
|--------------------|-------------------------------|-------------|-----------|--------------------|-----------|
| <i>snail</i>       | sna                           | FBgn0003448 | CG3956    | 10.06567708        | Yes       |
| <i>snail</i>       | l(2)05510                     | FBgn0028622 | CG13432   | 6.019522795        |           |
| <i>snail</i>       | esg                           | FBgn0001981 | CG3758    | 5.438088815        | Yes       |
| <i>snail</i>       | pyr                           | FBgn0033649 | CG13194   | 4.320828812        | Yes       |
| <i>snail</i>       | ldgf4                         | FBgn0026415 | CG1780    | 3.772949815        |           |
| <i>snail</i>       | CG31808                       | FBgn0062978 | CG31808   | 3.481828608        |           |
| <i>snail</i>       | htl                           | FBgn0010389 | CG7223    | 2.706344789        | Yes       |
| <i>snail</i>       | Ggamma30A                     | FBgn0267252 | CG3694    | 1.88490427         |           |
| <i>snail</i>       | if                            | FBgn0001250 | CG9623    | 1.361821658        |           |
| <i>snail</i>       | CG31516                       | FBgn0051516 | CG31516   | 1.332014094        | Yes       |
| <i>snail</i>       | Ama                           | FBgn0000071 | CG2198    | 1.282418899        | Yes       |
| <i>snail</i>       | CG13928                       | FBgn0035246 | CG13928   | 0.945532592        | Yes       |
| <i>snail</i>       | tok                           | FBgn0004885 | CG6863    | 0.785310731        | Yes       |
| <i>snail</i>       | dally                         | FBgn0263930 | CG4974    | 0.761523509        | Yes       |
| <i>snail</i>       | CG3624                        | FBgn0034724 | CG3624    | 0.710650399        |           |
| <i>snail</i>       | CG5455                        | FBgn0039430 | CG5455    | 0.701973435        |           |
| <i>snail</i>       | hoe1                          | FBgn0041150 | CG12787   | 0.683715599        |           |
| <i>snail</i>       | CG5895                        | FBgn0036560 | CG5895    | 0.535425178        |           |
| <i>snail</i>       | CG3800                        | FBgn0034802 | CG3800    | -0.419648113       |           |
| <i>snail</i>       | CG12099                       | FBgn0035232 | CG12099   | -0.428194298       |           |
| <i>snail</i>       | CG5118                        | FBgn0031317 | CG5118    | -0.463998841       |           |
| <i>snail</i>       | CG3860                        | FBgn0034951 | CG3860    | -0.562885083       | Yes       |
| <i>snail</i>       | tmod                          | FBgn0082582 | CG1539    | -0.58824945        | Yes       |
| <i>snail</i>       | Cap-H2                        | FBgn0037831 | CG14685   | -0.629304699       |           |
| <i>snail</i>       | CG33926                       | FBgn0053926 | CG33926   | -0.634353699       |           |
| <i>snail</i>       | CG8547                        | FBgn0033919 | CG8547    | -0.640350549       |           |
| <i>snail</i>       | Paip2                         | FBgn0038100 | CG12358   | -0.722847538       |           |
| <i>snail</i>       | CG3376                        | FBgn0034997 | CG3376    | -0.801759241       | Yes       |
| <i>twist</i>       | CG15611                       | FBgn0034194 | CG15611   | Inf                |           |
| <i>twist</i>       | CG15658                       | FBgn0034602 | CG15658   | Inf                | Yes       |
| <i>twist</i>       | CG17270                       | FBgn0038828 | CG17270   | Inf                |           |
| <i>twist</i>       | acj6                          | FBgn0000028 | CG9151    | Inf                |           |
| <i>twist</i>       | alphaTub85E                   | FBgn0003886 | CG9476    | Inf                |           |
| <i>twist</i>       | ect                           | FBgn0000451 | CG6611    | Inf                |           |
| <i>twist</i>       | twi                           | FBgn0003900 | CG2956    | Inf                | Yes       |
| <i>twist</i>       | lmd                           | FBgn0039039 | CG4677    | Inf                | Yes       |
| <i>twist</i>       | dei                           | FBgn0263118 | CG5441    | 6.248589419        | Yes       |
| <i>twist</i>       | PGRP-LB                       | FBgn0037906 | CG14704   | 6.13543379         |           |
| <i>twist</i>       | CCKLR-17D3                    | FBgn0030954 | CG32540   | 4.434007846        | Yes       |
| <i>twist</i>       | htl                           | FBgn0010389 | CG7223    | 3.936688181        | Yes       |

|              |            |             |         |             |     |
|--------------|------------|-------------|---------|-------------|-----|
| <i>twist</i> | navy       | FBgn0005636 | CG3385  | 3.64454539  | Yes |
| <i>twist</i> | e          | FBgn0000527 | CG3331  | 3.638143579 |     |
| <i>twist</i> | alpha-Est1 | FBgn0015568 | CG1031  | 3.505377756 | Yes |
| <i>twist</i> | btn        | FBgn0014949 | CG5264  | 3.409022052 | Yes |
| <i>twist</i> | CG3376     | FBgn0034997 | CG3376  | 3.017699542 | Yes |
| <i>twist</i> | CG13707    | FBgn0035578 | CG13707 | 2.995481719 | Yes |
| <i>twist</i> | CG6231     | FBgn0038720 | CG6231  | 2.984047614 | Yes |
| <i>twist</i> | Pu         | FBgn0003162 | CG9441  | 2.887683306 |     |
| <i>twist</i> | CG17032    | FBgn0036547 | CG17032 | 2.829535333 |     |
| <i>twist</i> | sano       | FBgn0034408 | CG12758 | 2.805911606 | Yes |
| <i>twist</i> | CG9150     | FBgn0031775 | CG9150  | 2.792648879 |     |
| <i>twist</i> | Bili       | FBgn0039282 | CG11848 | 2.424495665 | Yes |
| <i>twist</i> | CG12402    | FBgn0038202 | CG12402 | 2.287528386 | Yes |
| <i>twist</i> | pyd3       | FBgn0037513 | CG3027  | 1.849919318 | Yes |
| <i>twist</i> | trol       | FBgn0267911 | CG33950 | 1.813775804 | Yes |
| <i>twist</i> | kon        | FBgn0032683 | CG10275 | 1.792138095 | Yes |
| <i>twist</i> | Fuca       | FBgn0036169 | CG6128  | 1.759441705 |     |
| <i>twist</i> | SerT       | FBgn0010414 | CG4545  | 1.68233002  |     |
| <i>twist</i> | CG17181    | FBgn0035144 | CG17181 | 1.441725877 | Yes |
| <i>twist</i> | CG7149     | FBgn0031948 | CG7149  | 1.440411931 |     |
| <i>twist</i> | if         | FBgn0001250 | CG9623  | 1.396773256 | Yes |
| <i>twist</i> | CG18557    | FBgn0031470 | CG18557 | 1.328767553 |     |
| <i>twist</i> | Mmp1       | FBgn0035049 | CG4859  | 1.236089352 |     |
| <i>twist</i> | CG13506    | FBgn0034723 | CG13506 | 1.229569672 | Yes |
| <i>twist</i> | rut        | FBgn0003301 | CG9533  | 1.228660489 | Yes |
| <i>twist</i> | CG30089    | FBgn0050089 | CG30089 | 1.152076771 | Yes |
| <i>twist</i> | nkd        | FBgn0002945 | CG11614 | 1.150717399 | Yes |
| <i>twist</i> | CG6406     | FBgn0034269 | CG6406  | 1.067665782 |     |
| <i>twist</i> | RhoL       | FBgn0014380 | CG9366  | 1.04021967  | Yes |
| <i>twist</i> | CG14741    | FBgn0037989 | CG14741 | 0.997668804 |     |
| <i>twist</i> | CG32813    | FBgn0052813 | CG32813 | 0.994802235 |     |
| <i>twist</i> | CG8451     | FBgn0031998 | CG8451  | 0.963138737 |     |
| <i>twist</i> | zormin     | FBgn0052311 | CG33484 | 0.903534883 | Yes |
| <i>twist</i> | CG5916     | FBgn0038401 | CG5916  | 0.898968909 |     |
| <i>twist</i> | CG10962    | FBgn0030073 | CG10962 | 0.880539393 |     |
| <i>twist</i> | CG33116    | FBgn0053116 | CG33116 | 0.864437342 | Yes |
| <i>twist</i> | Sans       | FBgn0033785 | CG13320 | 0.853707309 |     |
| <i>twist</i> | sick       | FBgn0263873 | CG43720 | 0.786380378 | Yes |
| <i>twist</i> | CG42806    | FBgn0261975 | CG42806 | 0.743647143 |     |
| <i>twist</i> | ash2       | FBgn0000139 | CG6677  | 0.713986802 | Yes |
| <i>twist</i> | CG7872     | FBgn0030658 | CG7872  | 0.680440718 | Yes |
| <i>twist</i> | Pax        | FBgn0041789 | CG31794 | 0.660397209 | Yes |
| <i>twist</i> | CG4802     | FBgn0034215 | CG4802  | 0.57850087  |     |
| <i>twist</i> | miple2     | FBgn0029002 | CG18321 | 0.560957173 | Yes |
| <i>twist</i> | SP1173     | FBgn0035710 | CG10121 | 0.558605324 | Yes |
| <i>twist</i> | argos      | FBgn0062279 | CG4531  | 0.552945125 | Yes |
| <i>twist</i> | CG6522     | FBgn0034223 | CG6522  | 0.544987319 |     |
| <i>twist</i> | Fit2       | FBgn0036688 | CG7729  | 0.50990303  | Yes |

|                      |            |             |         |              |     |
|----------------------|------------|-------------|---------|--------------|-----|
| <i>twist</i>         | Rac2       | FBgn0014011 | CG8556  | 0.442453783  | Yes |
| <i>twist</i>         | CG32772    | FBgn0052772 | CG32772 | 0.437854963  | Yes |
| <i>twist</i>         | lig3       | FBgn0038035 | CG17227 | -0.451475123 | Yes |
| <i>twist</i>         | dnr1       | FBgn0260866 | CG12489 | -0.498567259 | Yes |
| <i>twist</i>         | Cp1        | FBgn0013770 | CG6692  | -0.753112048 | Yes |
| <i>twist</i>         | CG6206     | FBgn0027611 | CG6206  | -0.885978932 | Yes |
| <i>twist</i>         | eag        | FBgn0000535 | CG10952 | -1.207357152 | Yes |
|                      |            |             |         |              |     |
| <i>snail + twist</i> | CG42741    | FBgn0261705 | CG42741 | Inf          |     |
| <i>snail + twist</i> | acj6       | FBgn0000028 | CG9151  | Inf          |     |
| <i>snail + twist</i> | ect        | FBgn0000451 | CG6611  | Inf          |     |
| <i>snail + twist</i> | twi        | FBgn0003900 | CG2956  | Inf          | Yes |
| <i>snail + twist</i> | CG17270    | FBgn0038828 | CG17270 | Inf          |     |
| <i>snail + twist</i> | sna        | FBgn0003448 | CG3956  | 10.37275099  | Yes |
| <i>snail + twist</i> | esg        | FBgn0001981 | CG3758  | 6.140652322  | Yes |
| <i>snail + twist</i> | l(2)05510  | FBgn0028622 | CG13432 | 5.543924262  |     |
| <i>snail + twist</i> | dei        | FBgn0263118 | CG5441  | 5.457144722  |     |
| <i>snail + twist</i> | PGRP-LB    | FBgn0037906 | CG14704 | 5.243935125  |     |
| <i>snail + twist</i> | CCKLR-17D3 | FBgn0030954 | CG32540 | 4.025529417  |     |
| <i>snail + twist</i> | htl        | FBgn0010389 | CG7223  | 3.884987587  | Yes |
| <i>snail + twist</i> | pyr        | FBgn0033649 | CG13194 | 3.618856076  | Yes |
| <i>snail + twist</i> | CG17032    | FBgn0036547 | CG17032 | 2.718094087  |     |
| <i>snail + twist</i> | kon        | FBgn0032683 | CG10275 | 2.374588248  |     |
| <i>snail + twist</i> | sano       | FBgn0034408 | CG12758 | 2.307298725  | Yes |
| <i>snail + twist</i> | Ggamma30A  | FBgn0267252 | CG3694  | 2.120862762  |     |
| <i>snail + twist</i> | CG9150     | FBgn0031775 | CG9150  | 2.001881127  |     |
| <i>snail + twist</i> | nvy        | FBgn0005636 | CG3385  | 2.00178281   | Yes |
| <i>snail + twist</i> | CG9896     | FBgn0034808 | CG9896  | 1.904522714  |     |
| <i>snail + twist</i> | Pu         | FBgn0003162 | CG9441  | 1.838598354  |     |
| <i>snail + twist</i> | ldgf4      | FBgn0026415 | CG1780  | 1.806214988  |     |
| <i>snail + twist</i> | CG4793     | FBgn0028514 | CG4793  | 1.76408991   |     |
| <i>snail + twist</i> | CG8834     | FBgn0033733 | CG8834  | 1.705449418  |     |
| <i>snail + twist</i> | trol       | FBgn0267911 | CG33950 | 1.703599489  |     |
| <i>snail + twist</i> | CG31516    | FBgn0051516 | CG31516 | 1.655366594  | Yes |
| <i>snail + twist</i> | CG4301     | FBgn0030747 | CG4301  | 1.552425865  |     |
| <i>snail + twist</i> | CG3376     | FBgn0034997 | CG3376  | 1.544037935  | Yes |
| <i>snail + twist</i> | btn        | FBgn0014949 | CG5264  | 1.491184766  |     |
| <i>snail + twist</i> | SerT       | FBgn0010414 | CG4545  | 1.482499914  |     |
| <i>snail + twist</i> | v          | FBgn0003965 | CG2155  | 1.410454787  | Yes |
| <i>snail + twist</i> | if         | FBgn0001250 | CG9623  | 1.408778131  |     |
| <i>snail + twist</i> | CG17321    | FBgn0032719 | CG17321 | 1.246291866  |     |
| <i>snail + twist</i> | CG6639     | FBgn0032638 | CG6639  | 1.213727183  |     |
| <i>snail + twist</i> | CG13928    | FBgn0035246 | CG13928 | 1.199289325  | Yes |
| <i>snail + twist</i> | Aph-4      | FBgn0016123 | CG1462  | 1.185869675  |     |
| <i>snail + twist</i> | CG32813    | FBgn0052813 | CG32813 | 1.170251895  |     |
| <i>snail + twist</i> | SKIP       | FBgn0051163 | CG31163 | 1.169680202  | Yes |
| <i>snail + twist</i> | Pka-C3     | FBgn0000489 | CG6117  | 1.127181861  | Yes |
| <i>snail + twist</i> | Ama        | FBgn0000071 | CG2198  | 1.125932052  | Yes |

|                      |         |             |         |              |     |
|----------------------|---------|-------------|---------|--------------|-----|
| <i>snail + twist</i> | CG6330  | FBgn0039464 | CG6330  | 1.112434146  |     |
| <i>snail + twist</i> | nemy    | FBgn0261673 | CG8776  | 1.107010595  |     |
| <i>snail + twist</i> | CG3624  | FBgn0034724 | CG3624  | 1.105505605  |     |
| <i>snail + twist</i> | CG10962 | FBgn0030073 | CG10962 | 1.036090559  |     |
| <i>snail + twist</i> | CG2528  | FBgn0032969 | CG2528  | 1.025803311  |     |
| <i>snail + twist</i> | CG7149  | FBgn0031948 | CG7149  | 1.022627635  |     |
| <i>snail + twist</i> | fra     | FBgn0011592 | CG8581  | 1.01197296   | Yes |
| <i>snail + twist</i> | mGluRA  | FBgn0019985 | CG11144 | 1            | Yes |
| <i>snail + twist</i> | CG18557 | FBgn0031470 | CG18557 | 0.992334684  |     |
| <i>snail + twist</i> | tok     | FBgn0004885 | CG6863  | 0.977649328  | Yes |
| <i>snail + twist</i> | CG17181 | FBgn0035144 | CG17181 | 0.90838252   | Yes |
| <i>snail + twist</i> | CG15097 | FBgn0034396 | CG15097 | 0.883776856  |     |
| <i>snail + twist</i> | skpB    | FBgn0026176 | CG8881  | 0.857066758  |     |
| <i>snail + twist</i> | SP1173  | FBgn0035710 | CG10121 | 0.832775786  |     |
| <i>snail + twist</i> | CG3655  | FBgn0040397 | CG3655  | 0.791475081  | Yes |
| <i>snail + twist</i> | dally   | FBgn0263930 | CG4974  | 0.76164443   | Yes |
| <i>snail + twist</i> | CG10063 | FBgn0035727 | CG10063 | 0.74594449   |     |
| <i>snail + twist</i> | pirk    | FBgn0034647 | CG15678 | 0.72244173   |     |
| <i>snail + twist</i> | Mmp1    | FBgn0035049 | CG4859  | 0.683808515  |     |
| <i>snail + twist</i> | CG30089 | FBgn0050089 | CG30089 | 0.663719984  | Yes |
| <i>snail + twist</i> | Tret1-2 | FBgn0033644 | CG8234  | 0.633645809  |     |
| <i>snail + twist</i> | CG6406  | FBgn0034269 | CG6406  | 0.629092946  |     |
| <i>snail + twist</i> | Nrg     | FBgn0264975 | CG1634  | 0.621009959  |     |
| <i>snail + twist</i> | MtnA    | FBgn0002868 | CG9470  | 0.603007772  |     |
| <i>snail + twist</i> | CG6424  | FBgn0028494 | CG6424  | 0.547328703  | Yes |
| <i>snail + twist</i> | fan     | FBgn0028379 | CG7919  | 0.540930068  |     |
| <i>snail + twist</i> | CG33116 | FBgn0053116 | CG33116 | 0.538053255  |     |
| <i>snail + twist</i> | Socs36E | FBgn0041184 | CG15154 | 0.529432354  |     |
| <i>snail + twist</i> | CG42806 | FBgn0261975 | CG42806 | 0.518779062  |     |
| <i>snail + twist</i> | Thor    | FBgn0261560 | CG8846  | 0.510243144  | Yes |
| <i>snail + twist</i> | CG10383 | FBgn0032699 | CG10383 | 0.499216614  |     |
| <i>snail + twist</i> | cv-c    | FBgn0086901 | CG34389 | 0.462986411  | Yes |
| <i>snail + twist</i> | Lk6     | FBgn0017581 | CG17342 | 0.455326652  |     |
| <i>snail + twist</i> | vri     | FBgn0016076 | CG14029 | 0.450187221  | Yes |
| <i>snail + twist</i> | CG6199  | FBgn0036147 | CG6199  | 0.444258864  |     |
| <i>snail + twist</i> | Pax     | FBgn0041789 | CG31794 | 0.434728698  | Yes |
| <i>snail + twist</i> | Treh    | FBgn0003748 | CG9364  | 0.43307025   |     |
| <i>snail + twist</i> | Rcd5    | FBgn0263832 | CG1135  | 0.412392851  |     |
| <i>snail + twist</i> | Hsc70-3 | FBgn0001218 | CG4147  | 0.364419757  |     |
| <i>snail + twist</i> | Cct1    | FBgn0041342 | CG1049  | 0.352345712  | Yes |
| <i>snail + twist</i> | CG8801  | FBgn0028473 | CG8801  | 0.346977902  |     |
| <i>snail + twist</i> | CG12030 | FBgn0035147 | CG12030 | -0.337722248 |     |
| <i>snail + twist</i> | CG42668 | FBgn0261550 | CG42668 | -0.371017471 |     |
| <i>snail + twist</i> | SelD    | FBgn0261270 | CG8553  | -0.388574036 |     |
| <i>snail + twist</i> | CG32425 | FBgn0052425 | CG32425 | -0.41109005  |     |
| <i>snail + twist</i> | CG10859 | FBgn0032520 | CG10859 | -0.448912683 |     |
| <i>snail + twist</i> | Hexo2   | FBgn0041629 | CG1787  | -0.451942388 |     |
| <i>snail + twist</i> | CG11655 | FBgn0030638 | CG11655 | -0.484949774 | Yes |

|                      |             |             |         |              |     |
|----------------------|-------------|-------------|---------|--------------|-----|
| <i>snail + twist</i> | Act42A      | FBgn0000043 | CG12051 | -0.487886336 |     |
| <i>snail + twist</i> | bys         | FBgn0010292 | CG1430  | -0.489682006 |     |
| <i>snail + twist</i> | Lac         | FBgn0010238 | CG12369 | -0.499941833 | Yes |
| <i>snail + twist</i> | CG11255     | FBgn0036337 | CG11255 | -0.50131699  |     |
| <i>snail + twist</i> | CG8547      | FBgn0033919 | CG8547  | -0.56360757  |     |
| <i>snail + twist</i> | CG31075     | FBgn0051075 | CG31075 | -0.566316576 |     |
| <i>snail + twist</i> | Mec2        | FBgn0030993 | CG7635  | -0.597205703 |     |
| <i>snail + twist</i> | CG6126      | FBgn0038407 | CG6126  | -0.602223793 |     |
| <i>snail + twist</i> | CG14629     | FBgn0040398 | CG14629 | -0.631561894 |     |
| <i>snail + twist</i> | CG14523     | FBgn0039612 | CG14523 | -0.639535295 |     |
| <i>snail + twist</i> | CG33926     | FBgn0053926 | CG33926 | -0.645770184 |     |
| <i>snail + twist</i> | Cp1         | FBgn0013770 | CG6692  | -0.726536661 |     |
| <i>snail + twist</i> | aru         | FBgn0029095 | CG4276  | -0.85067735  | Yes |
| <i>snail + twist</i> | CG6805      | FBgn0034179 | CG6805  | -0.859840601 |     |
| <i>snail + twist</i> | CG3091      | FBgn0029608 | CG3091  | -0.935473524 |     |
| <i>snail + twist</i> | BM-40-SPARC | FBgn0026562 | CG6378  | -0.954289606 |     |
| <i>snail + twist</i> | Ugt35a      | FBgn0026315 | CG6644  | -0.954880883 |     |
| <i>snail + twist</i> | CG6206      | FBgn0027611 | CG6206  | -1.137715698 |     |
| <i>snail + twist</i> | CG16758     | FBgn0035348 | CG16758 | -Inf         |     |
| <i>snail + twist</i> | CG40472     | FBgn0085736 | CG40472 | -Inf         |     |
