# Supplementary material
Source: PubMed Central journal article supplement (PMC4596659)
Supplement: 10.1534_115.181065_genetics.115.181065-6.pdf [file 10.1534_115.181065_genetics.115.181065-6.pdf]

**Table S2 qPCR primers used in this study.**

| <b>Gene targeted</b> | <b>Forward Primer</b>      | <b>Reverse Primer</b>     |
|----------------------|----------------------------|---------------------------|
| <i>Rp49</i>          | ATCGGTTACGGATCGAACAA       | GACAATCTCCTTGCGCTTCT      |
| <i>wingless</i>      | CCAAGTCGAGGGCAAACAGAA      | TGGATCGCTGGGTCCATGTA      |
| <i>hindsight</i>     | ACATCCGGTGCCACAATTA        | AGGGATGAAGCCGAGGATAGC     |
| <i>snail</i>         | CGGAACCGAAACGTGACTAT       | CCTTTCCGGTGTTTTTGAAG      |
| <i>twist</i>         | AAGTCCCTGCAGCAGATCAT       | CGGCACAGGAAGTCAATGTA      |
| <i>engrailed</i>     | TCCGTGATCGGTGACATGAGT      | CGCCGACGTATCATCCACATC     |
| <i>period</i>        | GACTCGGCCTACTCGAACAG       | CGCGACTTATCCTTGTTGCG      |
| <i>yellow</i>        | TACCTGTTGGAGTCGAACACT      | GTGGCCGGAATCCCATCAC       |
| <i>Os aka upd1</i>   | GTCGGATAAAGTAGCTAACTTGAA   | AAACTTCAAGTTAGCTACTTTATC  |
| <i>Attacin-C</i>     | CGCCACCCAGAATCTACAGG       | CTTAGGTCCAATCGGGCATCG     |
| <i>Drosocin</i>      | GTCGGCAACAAGAGATTCTGAATGGG | AAACCCCATTCGAATCTCTTGTTGC |
