# Supplementary material
Source: PubMed Central journal article supplement (PMC4596659)
Supplement: 10.1534_115.181065_genetics.115.181065-7.pdf [file 10.1534_115.181065_genetics.115.181065-7.pdf]

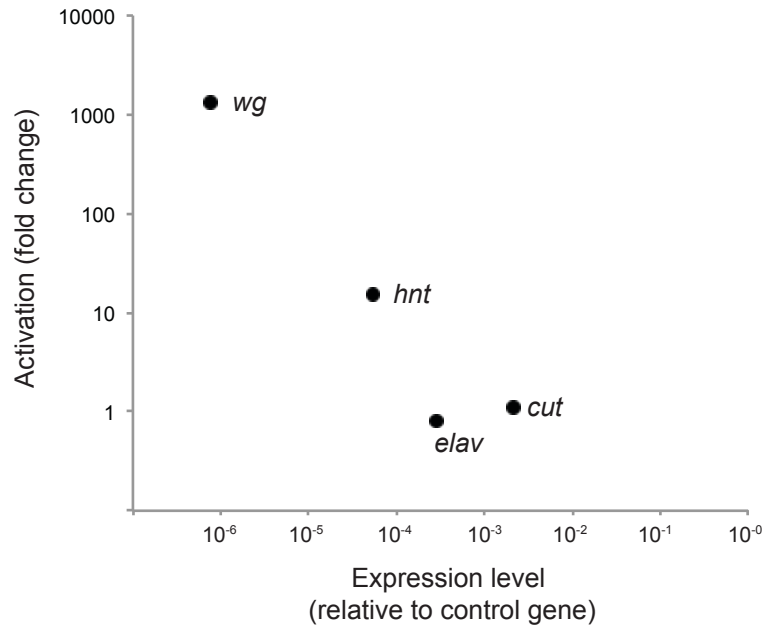

**Figure S1. Cas9 activation of target genes is inversely proportional to basal expression levels.** The activation level (fold change) is plotted against the relative expression level for four genes tested in parallel. Relative expression levels are estimated based on the difference in Ct values between the basal expression level of the target gene and a control gene, *Rp49*.
